# Supplementary material for: Photo-responsive and electrically switchable mesophases in a novel class of achiral bent-core azo compoundsElectronic supplementary information (ESI) available: colour versions of Figs. 3, 4, 7 and 8. See http://www.rsc.org/suppdata/jm/b3/b314482h/
Source: Royal Society of Chemistry journal article supplement (doi:10.1039/b314482h), 2004-01-01
Supplement: b314482h3.pdf [file b314482h3.pdf]

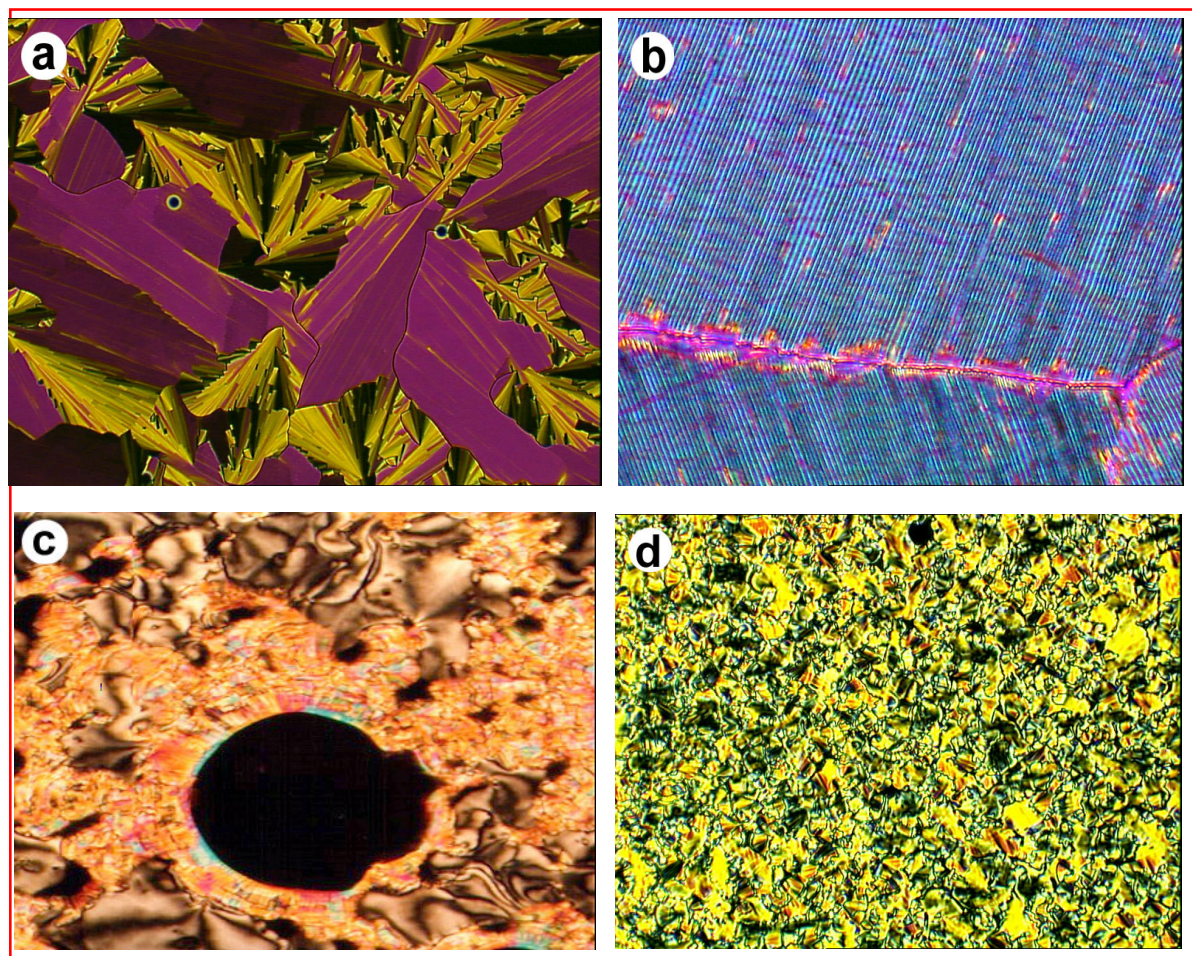

**Figure 3:** (a) The texture of  $B_1$  phase at 119.0 °C, obtained on cooling the isotropic phase of compound **1c**. On further cooling we obtain the phase  $B_x$  shown in (b). Observe the striped pattern, shown magnified (400 $\times$ ), formed on the fan-shaped texture of  $B_1$  phase. (c) The unspecified texture of  $B_2$  phase (along with the schlieren texture in some regions) exhibited by compound **1e** at 114.5 °C and (d) schlieren texture of the  $B_2$  phase of **2e**.
