# Supplementary material for: Photo-responsive and electrically switchable mesophases in a novel class of achiral bent-core azo compoundsElectronic supplementary information (ESI) available: colour versions of Figs. 3, 4, 7 and 8. See http://www.rsc.org/suppdata/jm/b3/b314482h/
Source: Royal Society of Chemistry journal article supplement (doi:10.1039/b314482h), 2004-01-01
Supplement: b314482h4.pdf [file b314482h4.pdf]

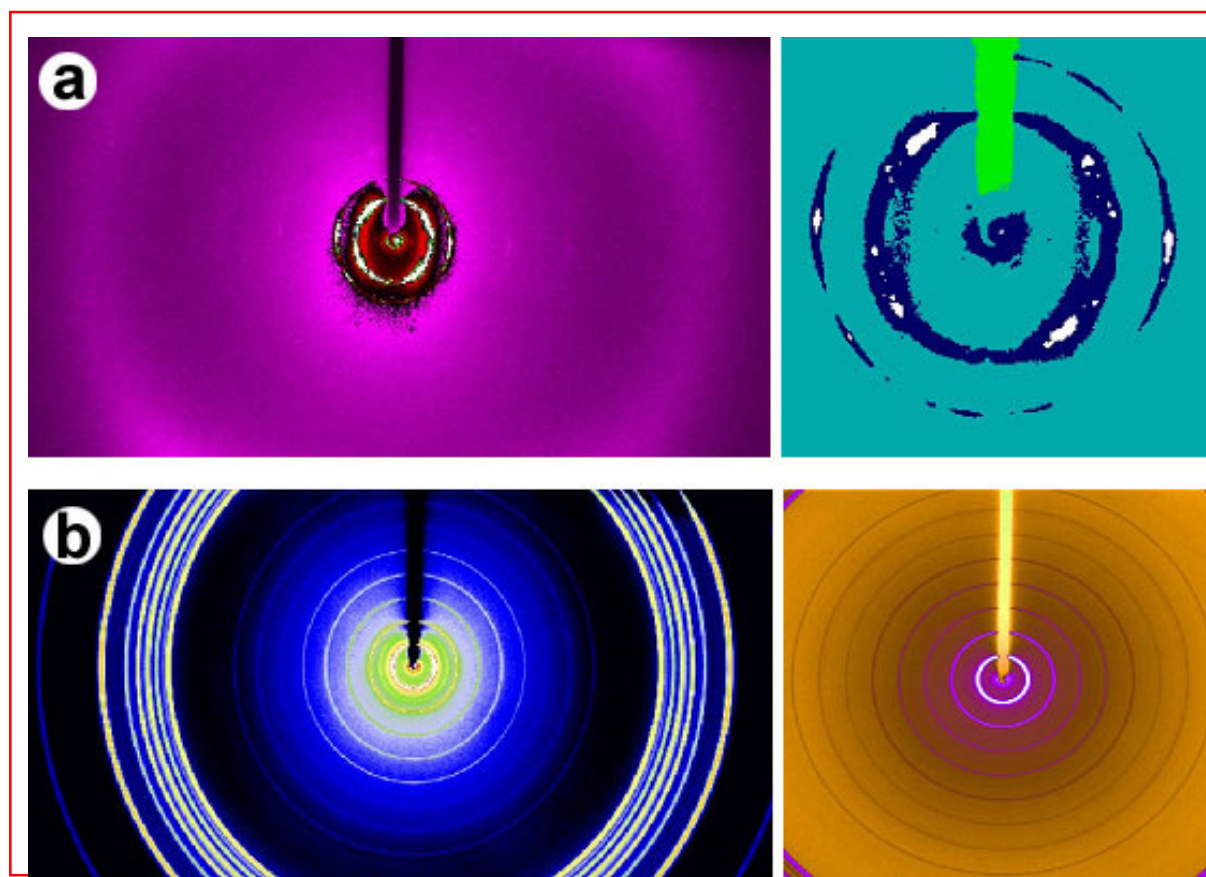

**Figure 4:** X-ray diffraction patterns of sample **1c** in different phases. The panels at right show the small angle scattering at high magnification. (a)  $B_1$  phase of sample at 115 °C. The sample is partially aligned and the small angle pattern resembles typical pattern of the  $B_1$  phase. (b) In the  $B_x$  phase at (109 °C)  $\sim 1.5$  K below the transition, two sets of rings, 9 harmonics of the reflection at 54.2 Å are seen at small angle (inset) and the second set at large angles.
