# Supplementary material for: Photo-responsive and electrically switchable mesophases in a novel class of achiral bent-core azo compoundsElectronic supplementary information (ESI) available: colour versions of Figs. 3, 4, 7 and 8. See http://www.rsc.org/suppdata/jm/b3/b314482h/
Source: Royal Society of Chemistry journal article supplement (doi:10.1039/b314482h), 2004-01-01
Supplement: b314482h7.pdf [file b314482h7.pdf]

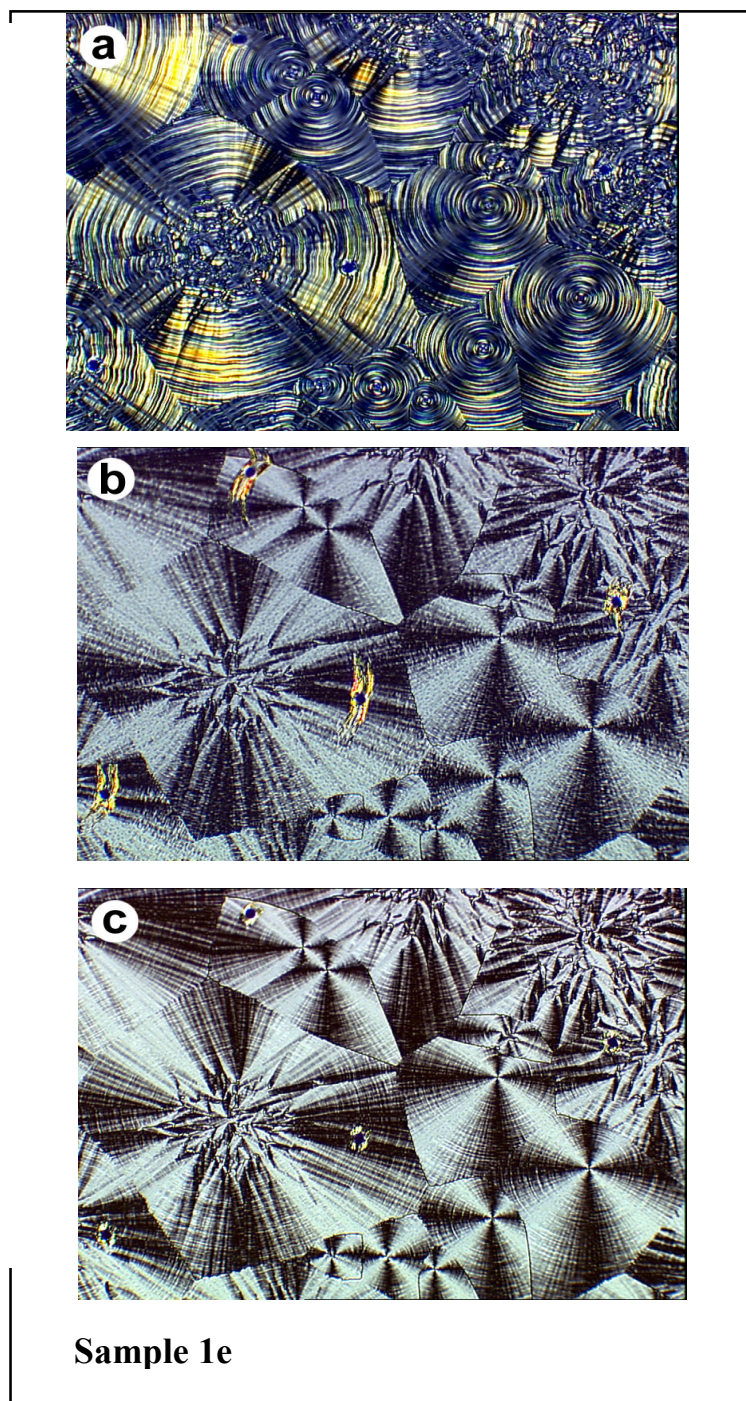

**Figure 7:** Optical texture of Sample 1e (a) with  $+20\text{V}/\mu\text{m}$ , (b) no field, and (c) with  $-20\text{ V}/\mu\text{m}$ .

Polarizer/analyzer is parallel/perpendicular to the image frame.
