# Supplementary material for: Photo-responsive and electrically switchable mesophases in a novel class of achiral bent-core azo compoundsElectronic supplementary information (ESI) available: colour versions of Figs. 3, 4, 7 and 8. See http://www.rsc.org/suppdata/jm/b3/b314482h/
Source: Royal Society of Chemistry journal article supplement (doi:10.1039/b314482h), 2004-01-01
Supplement: b314482h8.pdf [file b314482h8.pdf]

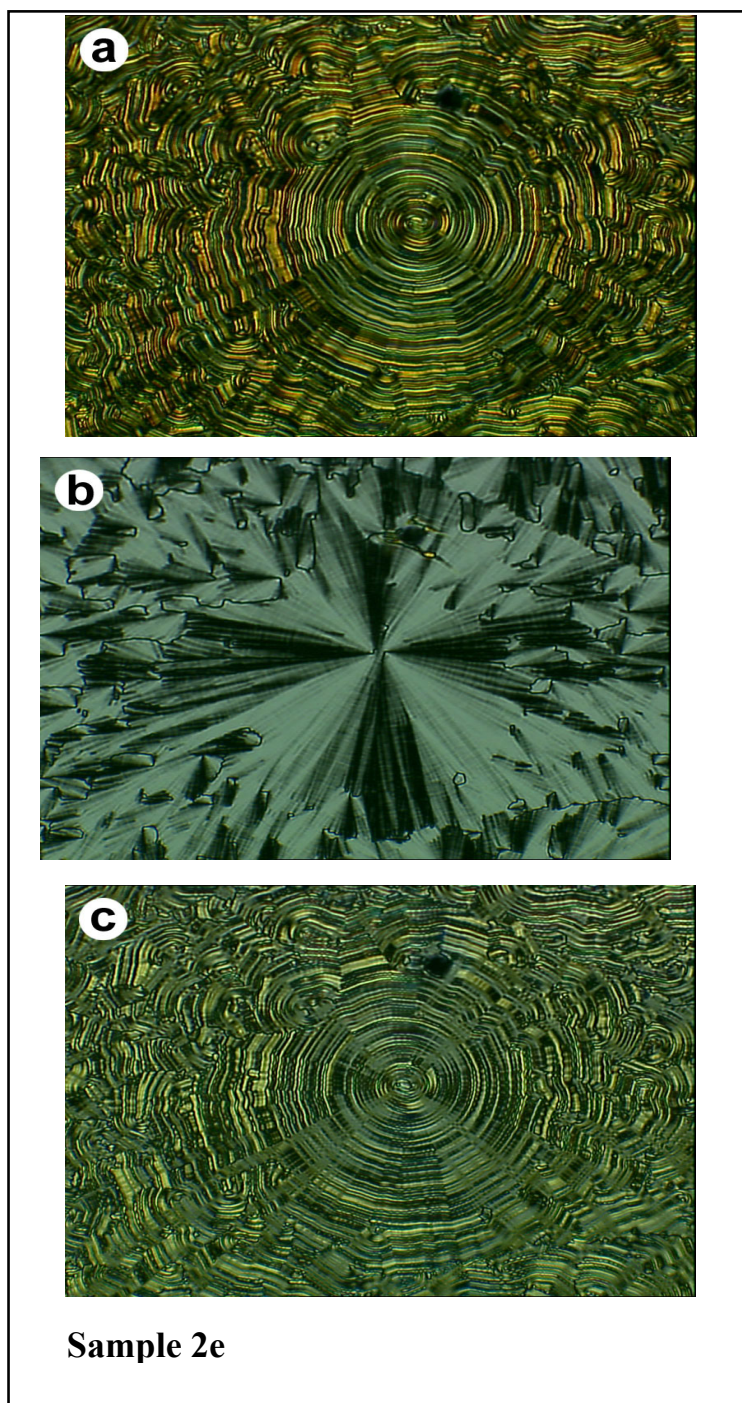

**Fig. 8:** Optical texture of Sample 2e (a) with an applied field of  $+20\text{V}/\mu\text{m}$ , (b) without field (c) with  $-20\text{V}/\mu\text{m}$ . Polarizer/analyzer is parallel/perpendicular to the image frame.
